# Supplementary material for: Development of new hydantoin-based biocidal polymers with improved rechargeability and anti-microbial activity
Source: Royal Society of Chemistry journal article supplement (doi:10.1039/c8nj06015k), 2019-01-01
Supplement: c8nj06015k1.pdf [file c8nj06015k1.pdf]

Electronic Supplementary Material (ESI) for New Journal of Chemistry

Manuscript ID NJ-ART-11-2018-006015

## Supplementary information

### Development of New Hydantoin-Based Biocidal Polymers with Improved Rechargeability and Anti-microbial Activity

Rajani Kant Rai\*, A. Jayakrishnan<sup>†</sup>

*Department of Biotechnology, Bhupat and Jyothi*

*Mehta School of Biosciences, Indian Institute of Technology Madras, Chennai 600 036,*

*Tamil Nadu, India*

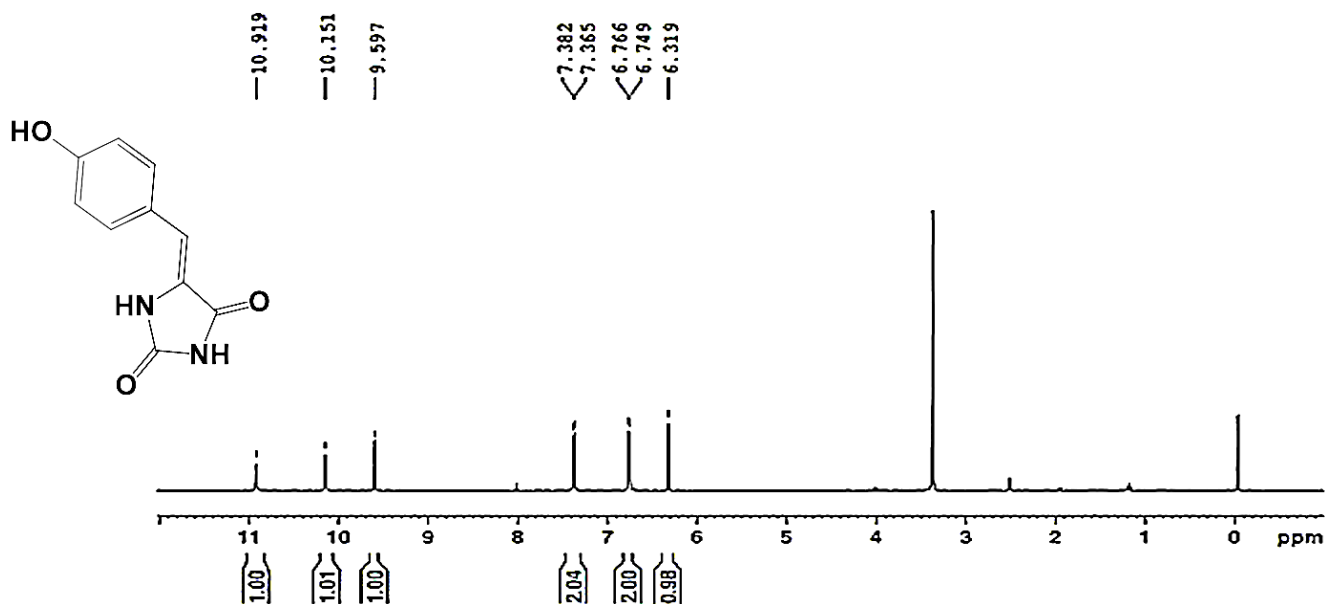

**Figure S1.** <sup>1</sup>H NMR spectrum of HBID

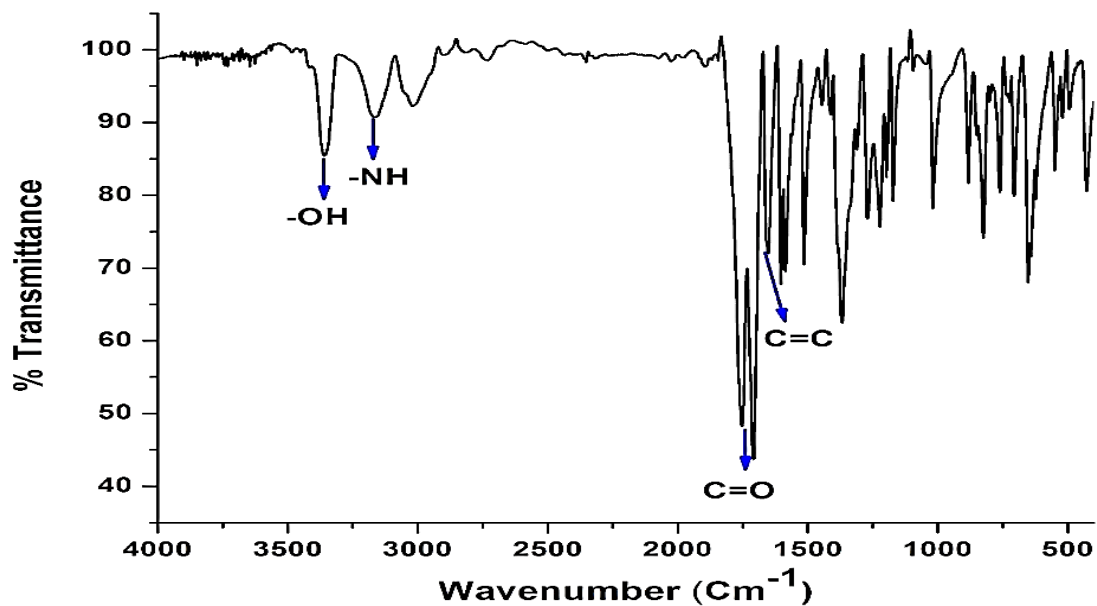

Figure S2. FTIR spectrum of HBID

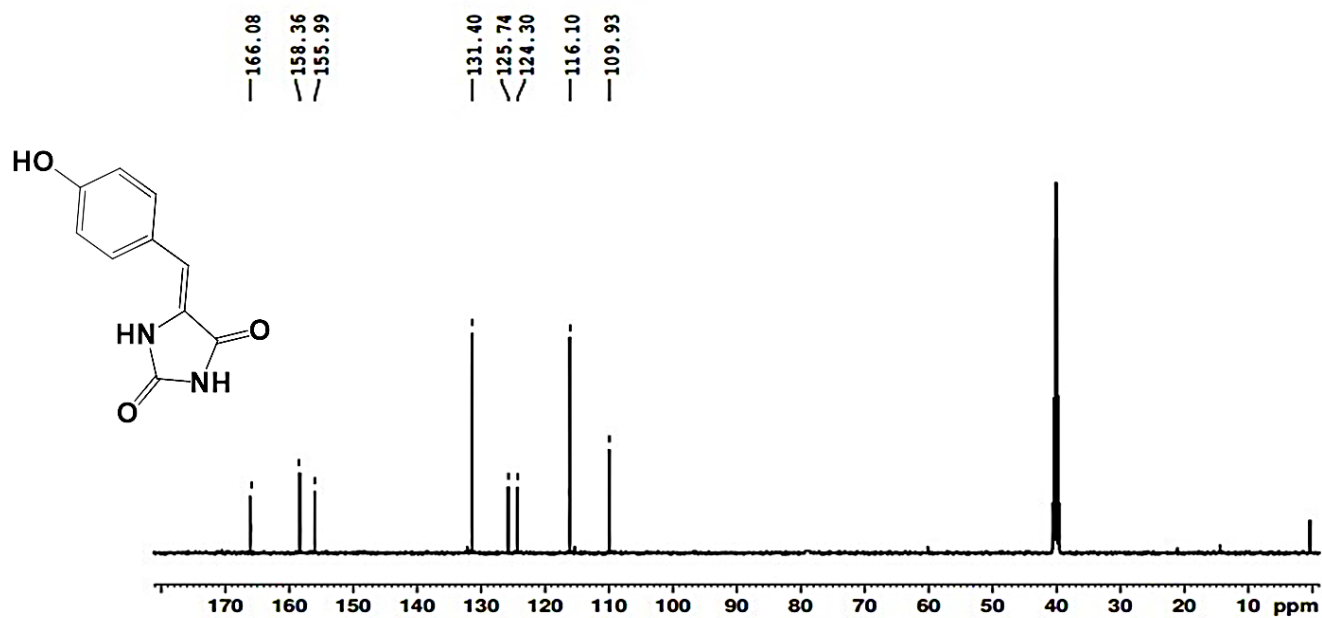

Figure S3. <sup>13</sup>C NMR spectrum of HBID

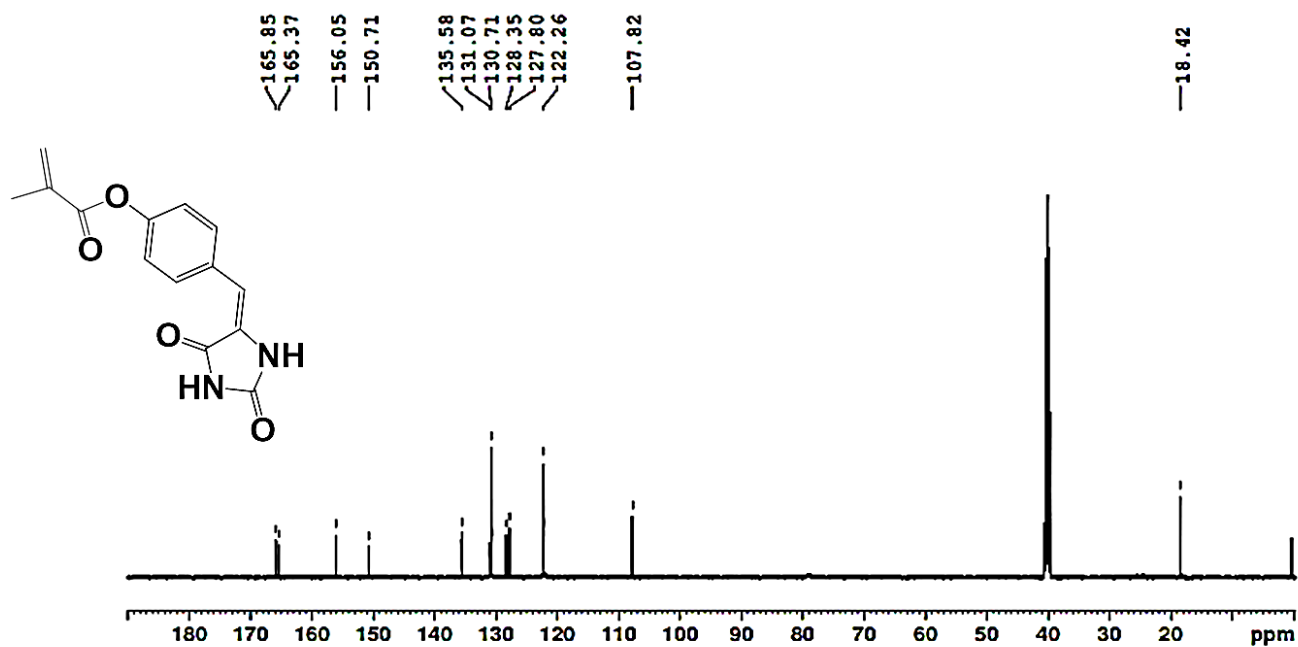

**Figure S4.**  $^{13}\text{C}$  NMR spectrum of MBID
